# Supplementary material for: Assignment Through Chiroptical Methods of The Absolute Configuration of Fungal Dihydropyranpyran-4-5-Diones Phytotoxins, Potential Herbicides for Buffelgrass (Cenchrus ciliaris) Biocontrol
Source: PubMed Central journal article supplement (PMC6749493; doi:10.3390/molecules24173022), 2019-08-21
Supplement: molecules-24-03022-s001.pdf [file molecules-24-03022-s001.pdf]

# Absolute configuration of fungal dihydropyranpyran-4-5-diones phytotoxins: potential herbicides for buffelgrass (*Cenchrus ciliaris*) biocontrol

Ernesto Santoro<sup>1,2,†</sup>, Giuseppe Mazzeo<sup>1,†</sup>, Giulia Marsico<sup>2,†</sup>, Marco Masi<sup>3,†</sup>, Giovanna Longhi<sup>1</sup>, Stefano Superchi<sup>2,\*</sup>, Antonio Evidente<sup>3,\*</sup> and Sergio Abbate<sup>1,\*</sup>

## SUPPORTING INFORMATION

With Addition of:

### Absolute configuration assignment of radicicol (3), 3-*epi*-radicinin (4), 3-*epi*-radicinol (5) via comparison of experimental and calculated VCD, ECD and ORD spectra.

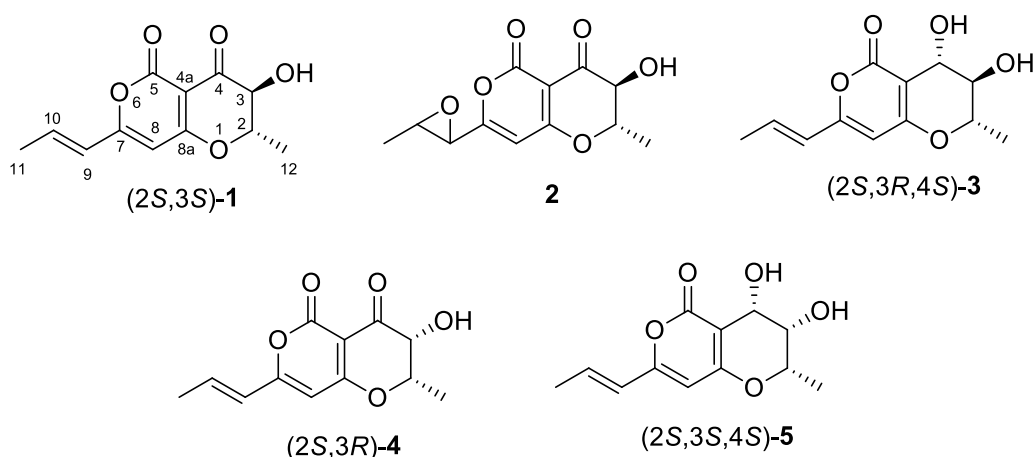

**Scheme S1.** Structure and assigned absolute configuration of radicicolin (1), and its structural analogues radicicolol (3), 3-*epi*-radicinin (4), 3-*epi*-radicinol (5) and cochliotoxin (2). 1 and 2 are discussed in the text, data and calculations for 3, 4 and 5 are given only in this SI file. (Sections SI-1 through SI-3)

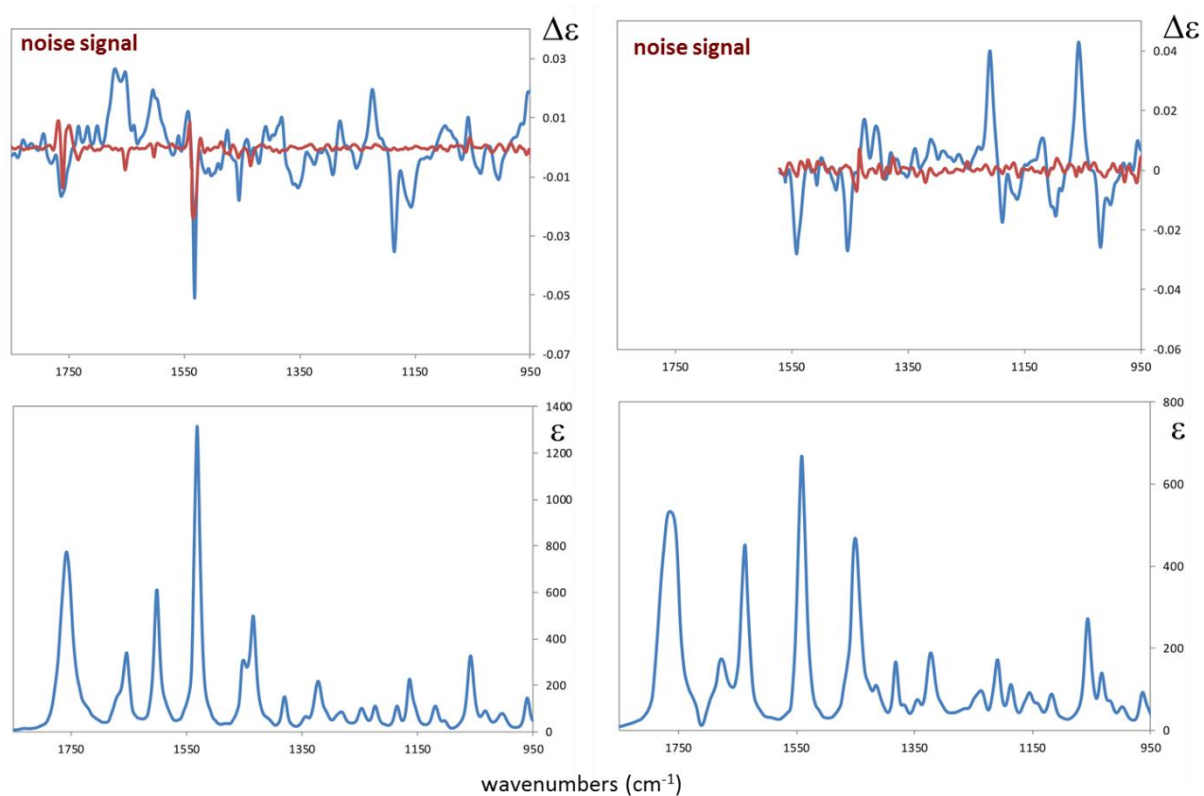

**Figure S1.** Experimental VCD (upper panels) and IR (lower panels) spectra of radicinin (1) (left) and cochliotoxin (2) (right) in  $\text{CDCl}_3$  solution. Noise level signal curves are reported in red solid lines.

**Table S1.** Conformers relative  $\Delta G$  energies (in kcal/mol units) and percent population factors (computed from the Boltzmann distribution) for radicinin (**1**) and cochliotoxin (**2**). The 3D-structures of the compounds are given in Figure S1.

| Radicinin (CHCl <sub>3</sub> ) |            |       | Radicinin (ACN) |            |       |
|--------------------------------|------------|-------|-----------------|------------|-------|
| Conformers                     | $\Delta G$ | % pop | Conformers      | $\Delta G$ | % pop |
| <b>1</b>                       | 0.00       | 89.2  | <b>1</b>        | 0.00       | 81.2  |
| <b>2</b>                       | 1.12       | 10.8  | <b>2</b>        | 0.87       | 18.8  |

  

| (9 <i>S</i> ,10 <i>R</i> )-cochliotoxin (CHCl <sub>3</sub> ) |            |       | (9 <i>S</i> ,10 <i>R</i> )-cochliotoxin (ACN) |            |       |
|--------------------------------------------------------------|------------|-------|-----------------------------------------------|------------|-------|
| Conformers                                                   | $\Delta G$ | % pop | Conformers                                    | $\Delta G$ | % pop |
| <b>1</b>                                                     | 0.00       | 99.9  | <b>1</b>                                      | 0.00       | 99.7  |
| <b>2</b>                                                     | 3.98       | 0.1   | <b>2</b>                                      | 3.47       | 0.3   |

  

| (9 <i>R</i> ,10 <i>S</i> )-cochliotoxin (CHCl <sub>3</sub> ) |            |       | (9 <i>R</i> ,10 <i>S</i> )-cochliotoxin (ACN) |            |       |
|--------------------------------------------------------------|------------|-------|-----------------------------------------------|------------|-------|
| Conformers                                                   | $\Delta G$ | % pop | Conformers                                    | $\Delta G$ | % pop |
| <b>1</b>                                                     | 0.00       | 99.0  | <b>1</b>                                      | 0.00       | 98.4  |
| <b>2</b>                                                     | 2.86       | 0.8   | <b>2</b>                                      | 2.57       | 1.3   |
| <b>3</b>                                                     | 3.69       | 0.2   | <b>3</b>                                      | 3.36       | 0.3   |

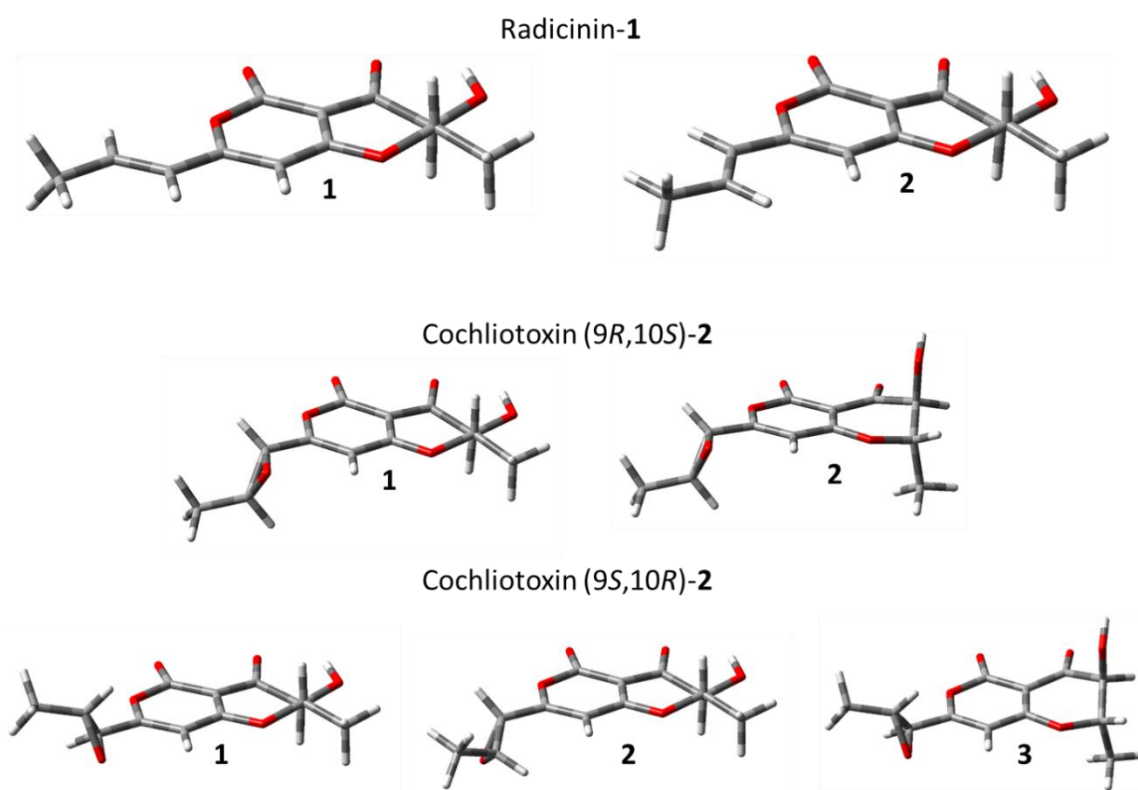

**Figure S2.** Calculated conformer structures of radicinin-1 and cochliotoxin-2.

### Section SI-1. AC of Radicinol (3)

Conformational search and DFT optimization at B3LYP/TZVP level of theory (PCM(CHCl<sub>3</sub>) was used for VCD and ORD calculation and PCM(ACN) for ECD calculation) provided 2 most populated conformers (Figure S2).

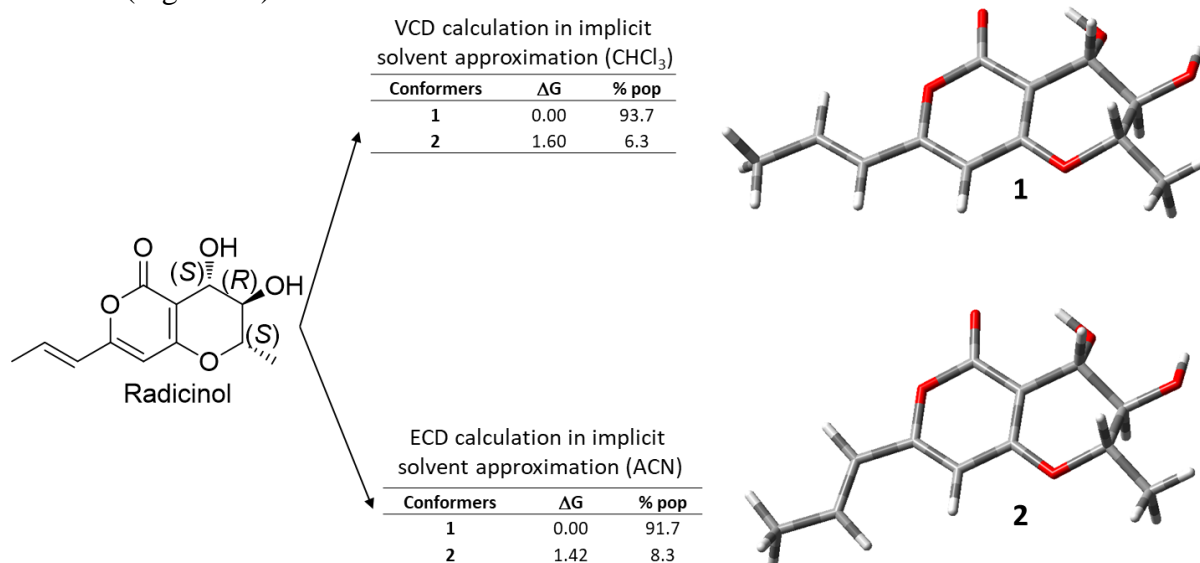

**Figure S3.** Calculated structures, relative  $\Delta G$  energies (in kcal/mol units) and population percentages of radicinol (3). DFT/B3LYP/TZVP(PCM) level of theory.

VCD-IR experimental spectra were recorded in CDCl<sub>3</sub> at concentration of 0.2M. The experimental spectra were compared to the calculated ones at DFT/B3LYP/TZVP/PCM(CHCl<sub>3</sub>) level of theory (Figure S3).

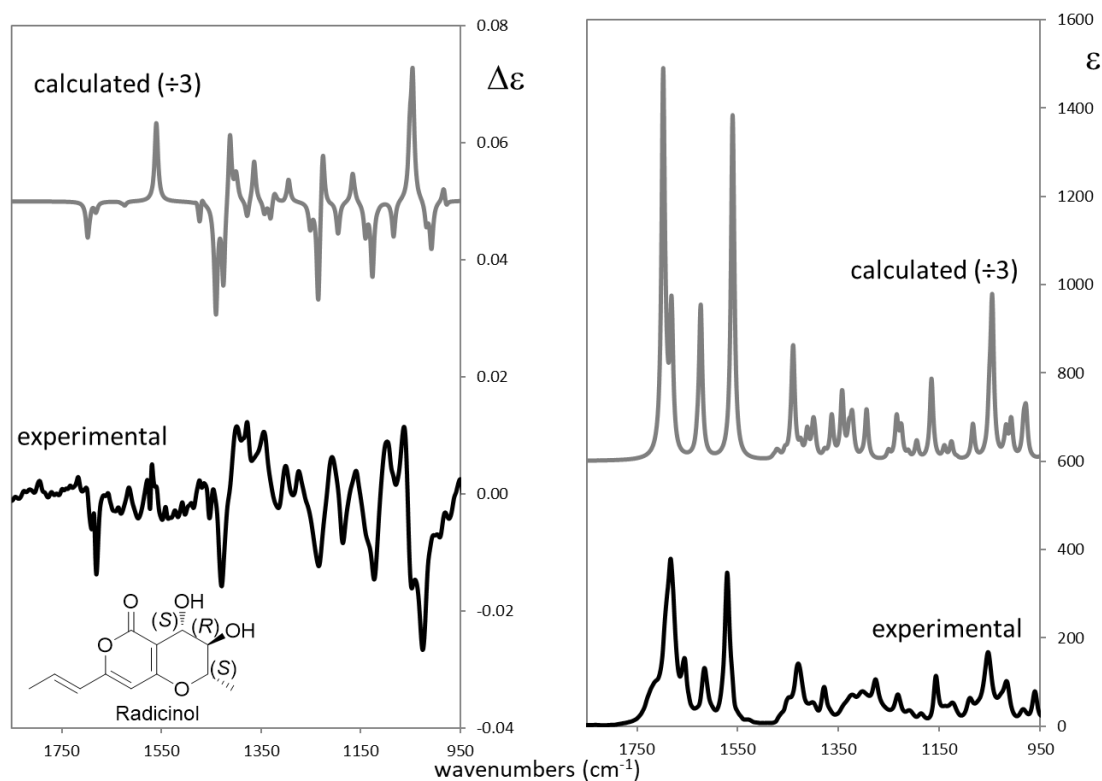

**Figure S4.** Comparison of experimental and calculated VCD (left) and IR (right) spectra of radicinol (3). DFT/B3LYP/TZVP/PCM(CHCl<sub>3</sub>) level of theory. 0.99 applied scaling factor.

ECD-UV experimental spectra were recorded in acetonitrile at concentration of 0.0051M. The experimental spectra were compared to the calculated ones at TD-DFT/CAM-B3LYP/aug-cc-pVDZ/PCM(ACN) level of theory (Figure S4).

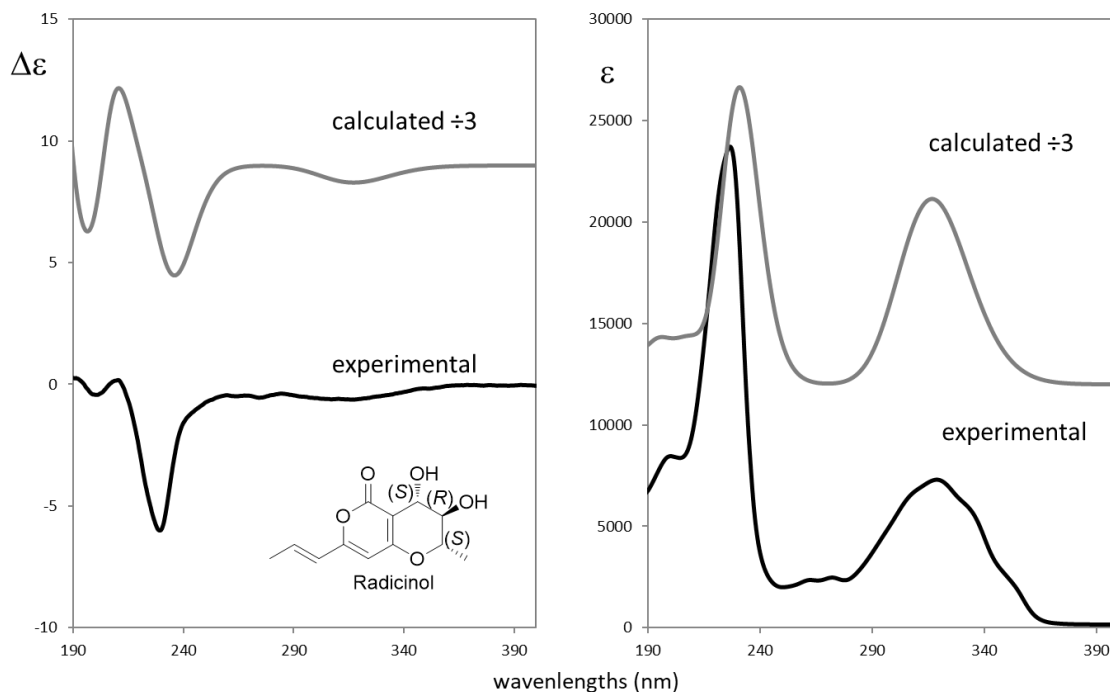

**Figure S5.** Comparison of experimental and calculated ECD (left) and UV (right) spectra of radicicol (3). TD-DFT/CAM-B3LYP/aug-cc-pVDZ/PCM(ACN) level of theory. Calculated spectra are 15 nm red-shifted.

ORD experimental spectrum was recorded in chloroform at concentration of 0.26 g/100mL. The experimental spectra were compared to the calculated ones at TD-DFT/B3LYP/aug-cc-pVDZ/PCM(CHCl<sub>3</sub>) level of theory (Figure S5).

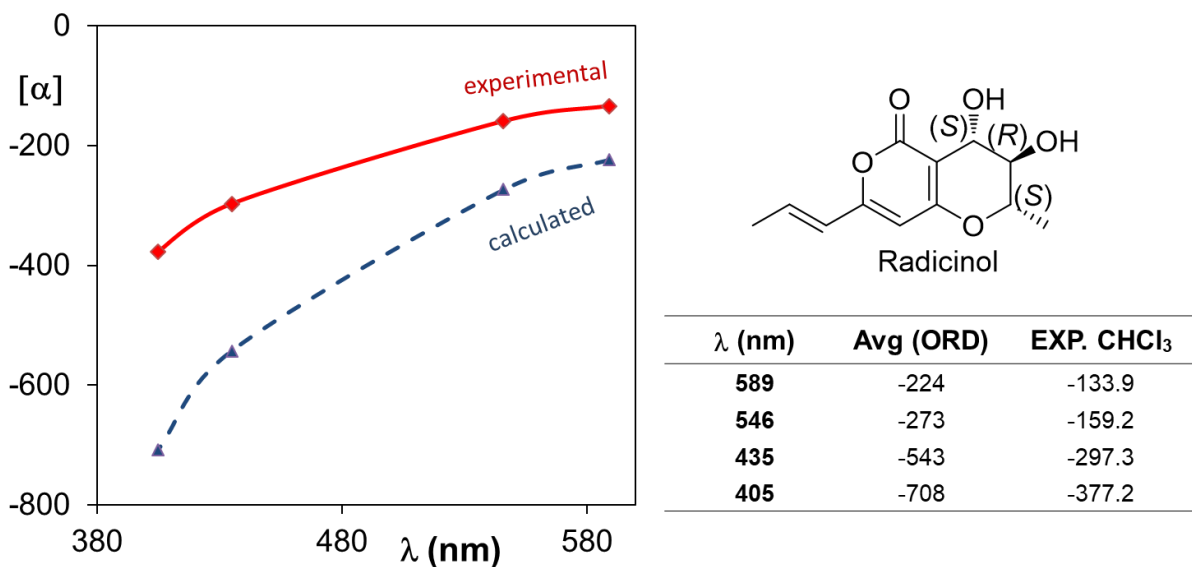

**Figure S6.** Comparison of experimental and calculated ORD of radicicol (3). TD-DFT/B3LYP/aug-cc-pVDZ/PCM(CHCl<sub>3</sub>) level of theory.

Section SI-2. AC of 3-*epi*-radicinin (4)

Conformational search and DFT optimization at B3LYP/TZVP level of theory (PCM(CHCl<sub>3</sub>) was used for VCD and ORD calculation and PCM(ACN) for ECD calculation) provided 2 most populated conformers (Figure S6).

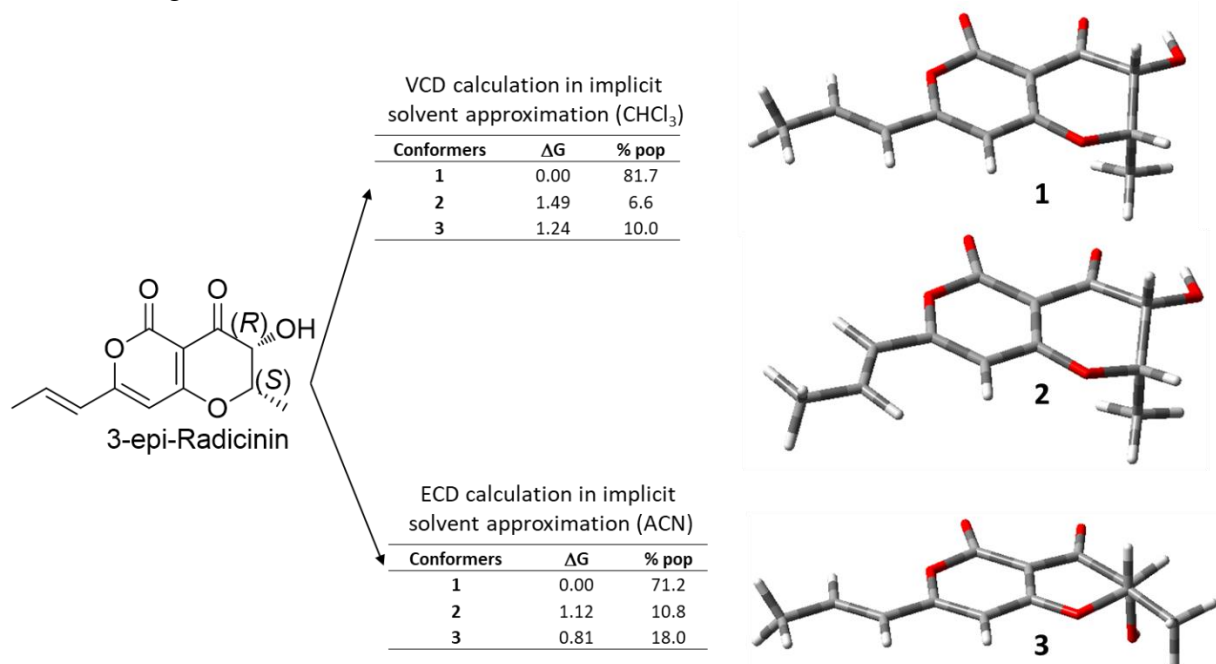

**Figure S7.** Calculated structures, relative  $\Delta G$  energies (in kcal/mol units) and population percentages of 3-*epi*-radicinin (4). DFT/B3LYP/TZVP(PCM) level of theory.

VCD-IR experimental spectra were recorded in CDCl<sub>3</sub> at concentration of 0.37M. The experimental spectra were compared to the calculated ones at DFT/B3LYP/TZVP/PCM(CHCl<sub>3</sub>) level of theory (Figure S7).

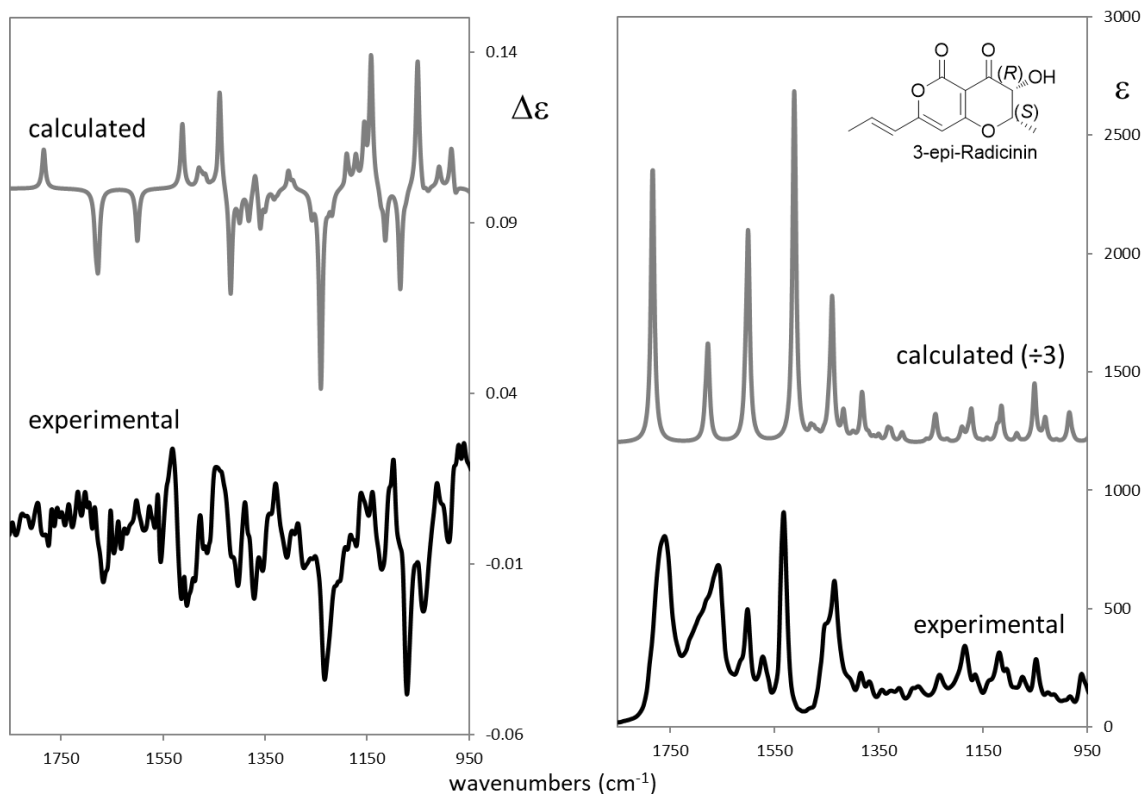

**Figure S8.** Comparison of experimental and calculated VCD (left) and IR (right) spectra of 3-*epi*-radicinin (**4**). DFT/B3LYP/TZVP/PCM(CHCl<sub>3</sub>) level of theory. 0.99 applied scaling factor.

ECD-UV experimental spectra were recorded in acetonitrile at concentration of 0.0053M. The experimental spectra were compared to the calculated ones at TD-DFT/CAM-B3LYP/aug-cc-pVDZ/PCM(ACN) level of theory (Figure S8).

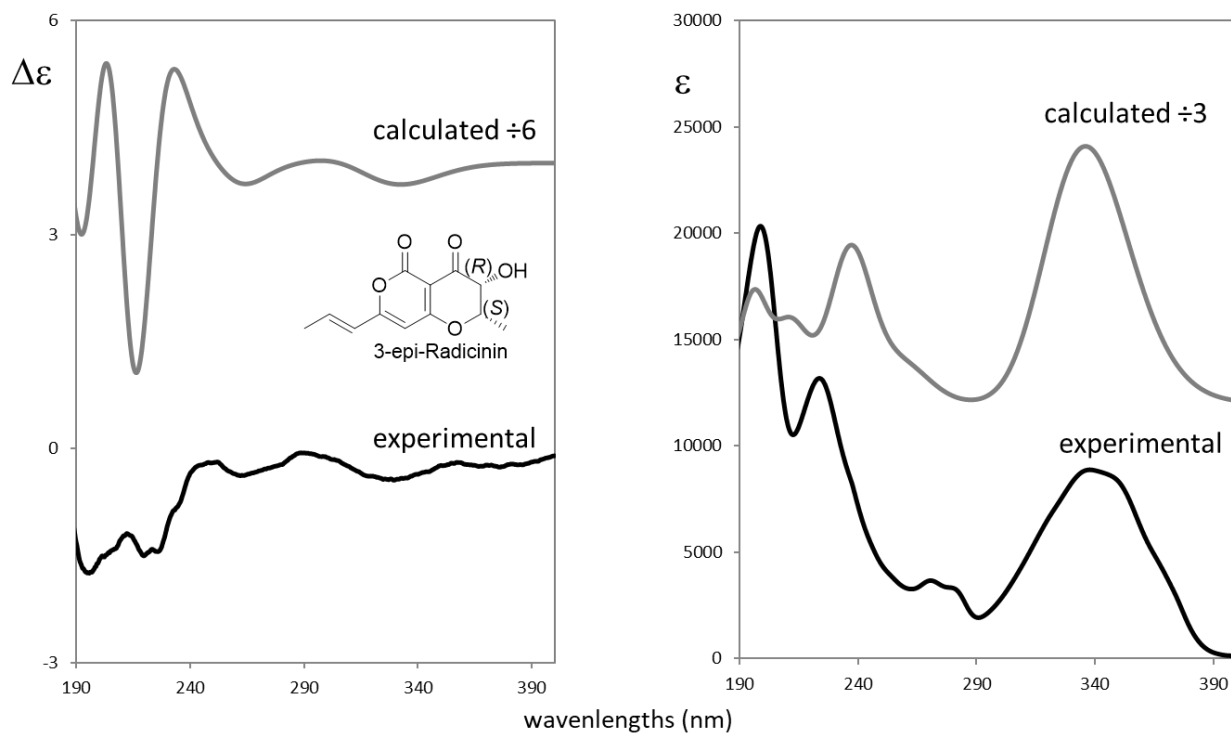

**Figure S9.** Comparison of experimental and calculated ECD (left) and UV (right) spectra of 3-*epi*-radicinin (**4**). TD-DFT/CAM-B3LYP/aug-cc-pVDZ/PCM(ACN) level of theory. Calculated spectra are 15 nm red-shifted.

ORD experimental spectrum was recorded in chloroform at concentration of 0.13 g/100mL. The experimental spectra were compared to the calculated ones at TD-DFT/B3LYP/aug-cc-pVDZ/PCM(CHCl<sub>3</sub>) level of theory (Figure S9).

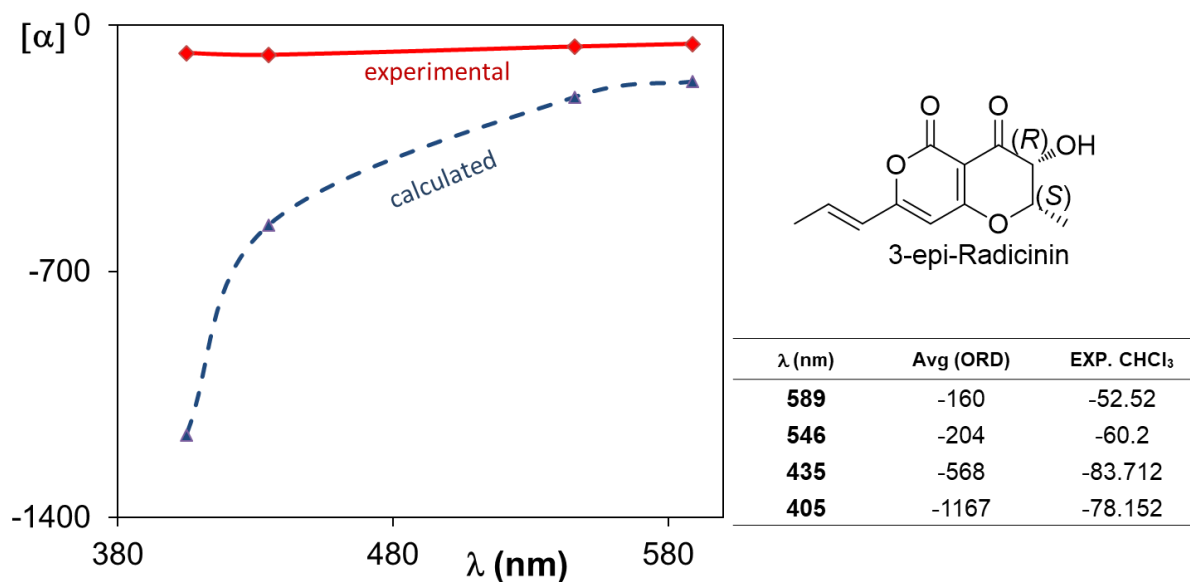

**Figure S10.** Comparison of experimental and calculated ORD of 3-*epi*-radicinin (**4**). TD-DFT/B3LYP/aug-cc-pVDZ/PCM(CHCl<sub>3</sub>) level of theory.

### Section SI-3. AC of 3-*epi*-radicinol (**5**)

Conformational search and DFT optimization at B3LYP/TZVP level of theory (PCM(CHCl<sub>3</sub>) was used for VCD and ORD calculation and PCM(ACN) for ECD calculation) provided 2 most populated conformers (Figure S10).

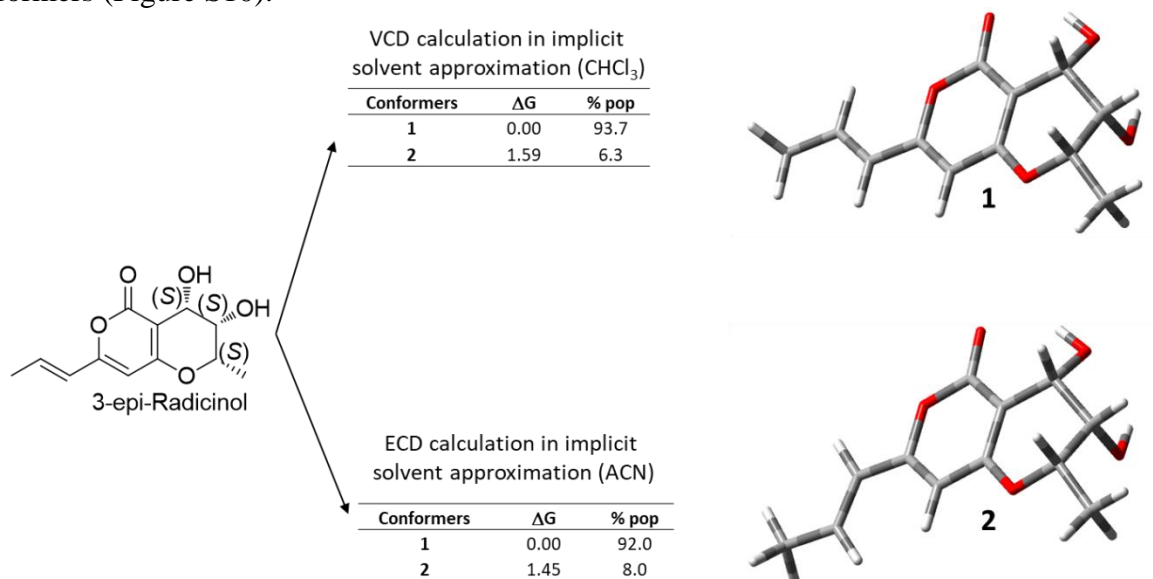

**Figure S11.** Calculated structures, relative  $\Delta G$  energies (in kcal/mol units) and population percentages of 3-*epi*-radicinol (**5**). DFT/B3LYP/TZVP(PCM) level of theory.



VCD-IR experimental spectra were recorded in  $\text{CDCl}_3$  and  $\text{ACN-d}_6$  at concentration of 0.2M. The experimental spectra were compared to the calculated ones at DFT/B3LYP/TZVP/PCM( $\text{CHCl}_3$ ) level of theory (Figure S11).

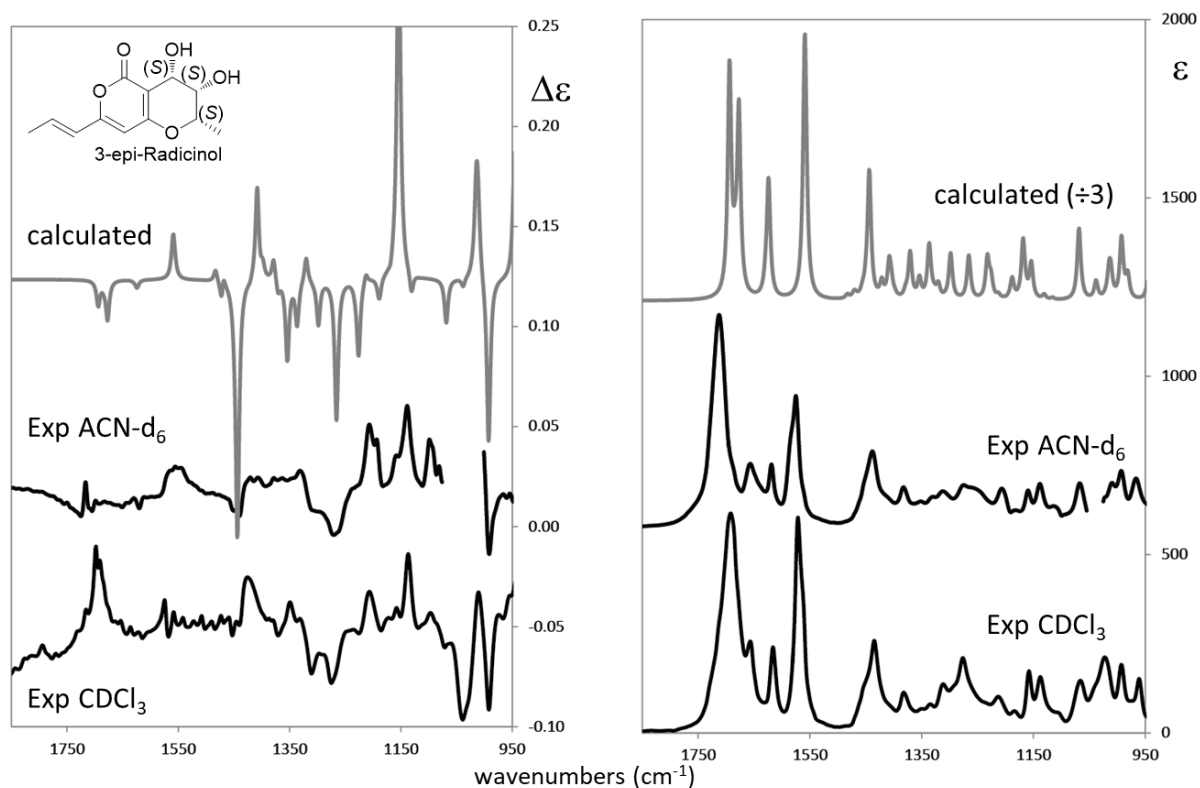

**Figure S12.** Comparison of experimental and calculated VCD (left) and IR (right) spectra of 3-*epi*-radicinol (**5**). DFT/B3LYP/TZVP/PCM( $\text{CHCl}_3$ ) level of theory. 0.99 applied scaling factor.

ECD-UV experimental spectra were recorded in acetonitrile at concentration of 0.0051M. The experimental spectra were compared to the calculated ones at TD-DFT/CAM-B3LYP/aug-cc-pVDZ/PCM( $\text{ACN}$ ) level of theory (Figure S12).

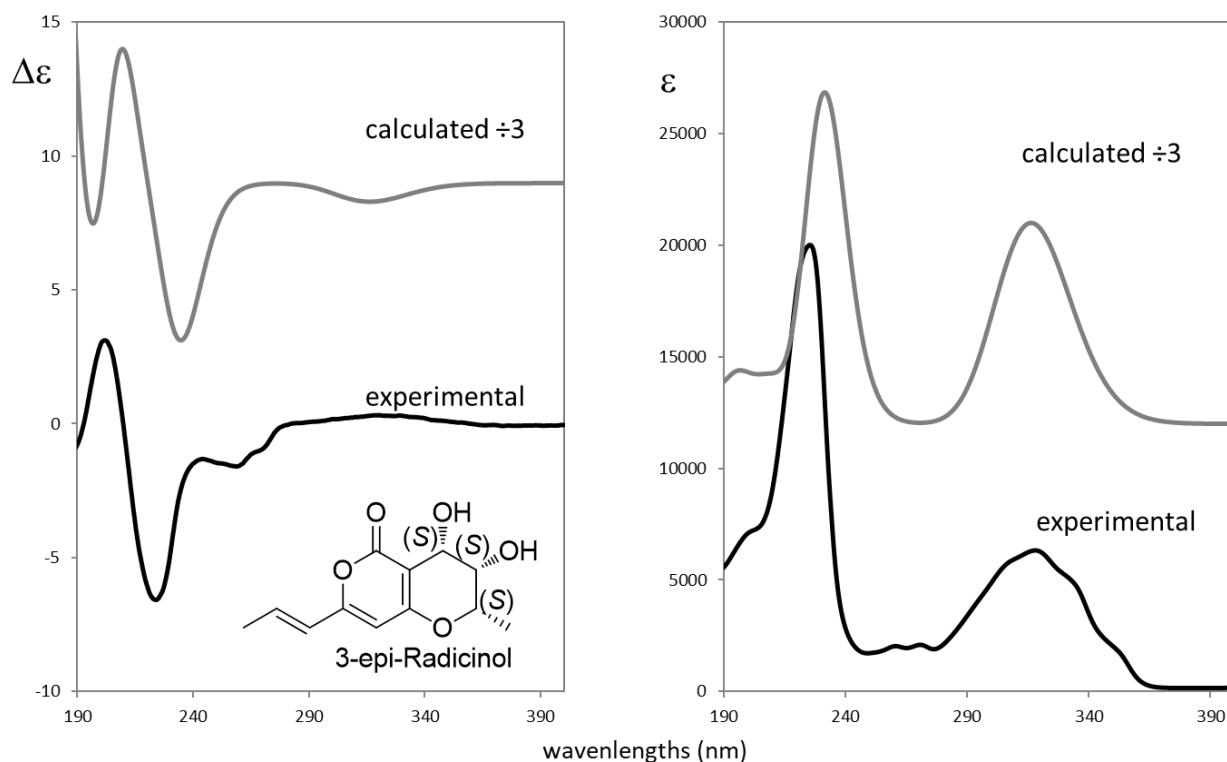

**Figure S13.** Comparison of experimental and calculated ECD (left) and UV (right) spectra of 3-*epi*-radicinol (**5**). TD-DFT/CAM-B3LYP/aug-cc-pVDZ/PCM(ACN) level of theory. Calculated spectra are 15 nm red-shifted.

ORD experimental spectrum was recorded in chloroform at concentration of 0.30 g/100mL. The experimental spectra were compared to the calculated ones at TD-DFT/B3LYP/aug-cc-pVDZ/PCM(CHCl<sub>3</sub>) level of theory (Figure S13).

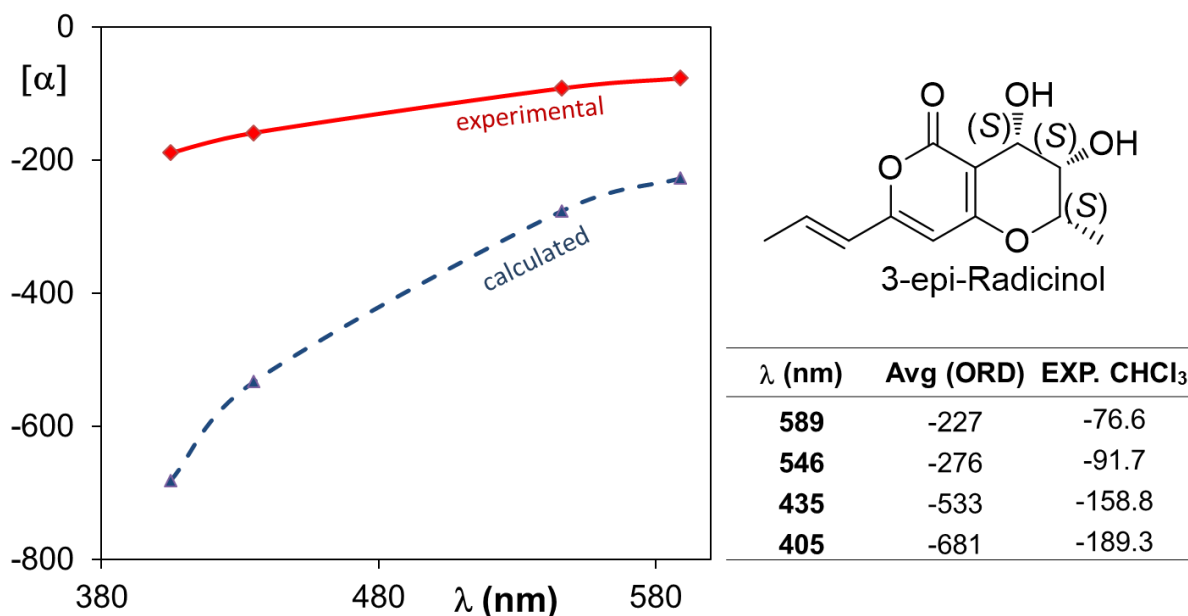

**Figure S14.** Comparison of experimental and calculated ORD of 3-*epi*-radicinol (**5**). TD-DFT/B3LYP/aug-cc-pVDZ/PCM(CHCl<sub>3</sub>) level of theory.
